# Supplementary material for: Detecting m6A RNA modification from nanopore sequencing using a semisupervised learning framework
Source: PubMed Central journal article supplement — Genome Res. 2024 Nov;34(11):1987–99. doi: 10.1101/gr.278960.124 (PMC11610579; doi:10.1101/gr.278960.124), 2024-11
Supplement: Supplemental_Material.pdf [file Supplemental_Material.pdf]

## 677 1 Supplementary Text

### 678 1.1 Summary of prior approaches

**Table S1.** Prior approaches concerning the identification of m6A modifications. AON: All-or-none modified dataset. KO: Knockout dataset.

| Method                                   | Structure   | Training data    | Input features                  |
|------------------------------------------|-------------|------------------|---------------------------------|
| Epinano (2019) (Liu et al. 2019)         | SVM         | AON              | Basecall error & Signal feature |
| ELIGOS (2021) (Jenjaroenpun et al. 2021) | Stat. anal. | –                | Basecall error                  |
| Nanocompore (2021) (Leger et al. 2021)   | GMM         | –                | Signal features                 |
| nanom6A (2021) (Gao et al. 2021)         | GBM         | AON              | Signal segments                 |
| CHEUI (2022) (Mateos et al. 2022)        | CNN         | AON              | Signal segments                 |
| m6Anet (2022) (Hendra et al. 2022)       | MLP         | In vivo KO       | Signal features & Sequence      |
| Xron (This work)                         | CRNN        | AON & In vivo KO | Raw signals                     |

### 679 1.2 K-mer encoded as integer

680 We encoded each  $k$ -mer with an integer by initially converting the  $k$ -mer string into a base- $b$  integer. For  
681 example, 'ACGTM' is represented as a base-5 integer  $01234_5$ . This base-5 integer is then converted into a  
682 base-10 integer ( $z_t$ ), where  $01234_5$  is transformed to  $112_{10}$ .

### 683 1.3 Signal segmentation

684 To determine the exact alignment between the raw current signals and the corresponding transcription  
685 positions, a signal segmentation procedure is typically required to assign consecutive signal points (called  
686 an event) to each base pair. The electrical current signals acquired from the ONT sequencer are 1D time-  
687 series signals sampled at 4,000 points per second. Under the direct RNA sequencing protocol, the average  
688 movement speed of RNA through the pore is 70 base pairs per second, resulting in an average of 57  
689 sampling points per base pair. The signal level and duration of an event are decided by the five nucleotides  
690 inside the pore, where the middle nucleotide is the one to which we mapped.

## 1.4 Sampling algorithm

---

### Algorithm 1 Signal- $k$ -mer Graph Random Walk Sampling

---

**Input:**
 $G(V, E)$ 
 $N$ 
 $L$ 
 $\epsilon = 0.1$ 
 $\gamma = 0.1$ 
 $\triangleright$  Signal- $k$ -mer graph with nodes  $V$  and edges  $E$ 
 $\triangleright$  max number of segments to sample

 $\triangleright$  max length of each sampled segment

 $\triangleright$  exploration when sampling start node

 $\triangleright$  exploration factor when sampling edge

**Output:**
 $S$ 
 $\triangleright$  Sampled reads

1:  $S \leftarrow []$ 

2:  $v.\text{weights} = \#\text{edges starting with } v$ , for all  $v \in V$ 

3:  $e.\text{visits} = 0$ , for all  $e \in E$ 

4: **while**  $\text{len}(S) < N$  **do**

5:      $\text{curr\_s} = []$ 

6:

7:     **Pick the start node:**

8:     Generate a random number  $r \in [0, 1]$ 

9:     **if**  $r < \epsilon$  **then**

10:          $v \leftarrow \text{random node } \in V$ 

11:     **else**

12:          $v \leftarrow \text{argmax}_x(x.\text{weight}, x \in V)$ 

13:     **end if**

14:

15:     **Random walk along the graph:**

16:     **while**  $\text{len}(\text{curr\_s}) < L$  **do**

17:          $p = [\sqrt{\text{len}(S)/x.\text{visits for } x \text{ in } v.\text{edges}}] + \alpha * [q(x) \text{ for } x \text{ in } v.\text{edges}]$   $\triangleright$  Upper Confidence Bound

18:                      $\triangleright q(x)$  is the entropy of sequence  $x$ ,  $v.\text{edges}$  are edges starting from node  $v$ 

19:          $p = p/p.\text{sum}()$ 

20:         Generate a random number  $r \in [0, 1]$ 

21:         **if**  $r < \gamma$  **then**

22:              $e = \text{random choose } e \text{ from } v.\text{edges}$ 

23:         **else**

24:              $e = \text{choose } e \text{ according to } p$ 

25:         **end if**

26:          $\text{curr\_s.append}(e)$ 

27:          $e.\text{visits} \leftarrow e.\text{visits} + 1$ 

28:          $\text{curr\_v.weights} \leftarrow \#\{v.\text{edges}\} / \sqrt{\text{sum}([x.\text{visits for } x \text{ in } v.\text{edges}] )}$ 

29:     **end while**

30:      $S.append(\text{curr\_s})$ 

31: **end while**


---

**Table S2. Basecalling accuracy comparison between Xron and Guppy on three different datasets and their control datasets.** The deletion, insertion, and mismatch rates (%) were calculated as the numbers of deleted, inserted, and mismatched bases divided by the number of bases in the reference sequence, respectively. The identity rate (%) was defined as the number of matched bases in the query sequence divided by the number of bases in the reference sequence (the higher the better). All reported rates are mean values among the aligned reads.

| <b>Condition</b>         | <b>Model</b> | <b>Deletion rate (%)</b> | <b>Insertion rate (%)</b> | <b>Mismatch rate (%)</b> | <b>Identity rate (%)</b> (↑) |
|--------------------------|--------------|--------------------------|---------------------------|--------------------------|------------------------------|
| IVT Control              | Xron         | 4.14                     | 11.60                     | 8.51                     | 87.35                        |
|                          | Guppy        | 4.30                     | 2.20                      | 2.95                     | 92.75                        |
| IVT m6A                  | Xron         | 5.09                     | 15.04                     | 6.44                     | 88.48                        |
|                          | Guppy        | 9.11                     | 4.45                      | 12.60                    | 78.28                        |
| Yeast <i>ime4</i> Δ KO   | Xron         | 9.47                     | 4.54                      | 5.57                     | 84.97                        |
|                          | Guppy        | 4.97                     | 2.80                      | 2.54                     | 92.50                        |
| Yeast                    | Xron         | 9.12                     | 3.83                      | 6.92                     | 83.96                        |
|                          | Guppy        | 4.80                     | 2.38                      | 3.26                     | 91.94                        |
| HEK293T <i>METTL3</i> KO | Xron         | 10.41                    | 1.91                      | 3.68                     | 85.91                        |
|                          | Guppy        | 4.42                     | 2.59                      | 2.39                     | 93.19                        |
| HEK293T                  | Xron         | 9.46                     | 2.08                      | 3.43                     | 87.12                        |
|                          | Guppy        | 11.31                    | 2.45                      | 3.05                     | 85.64                        |

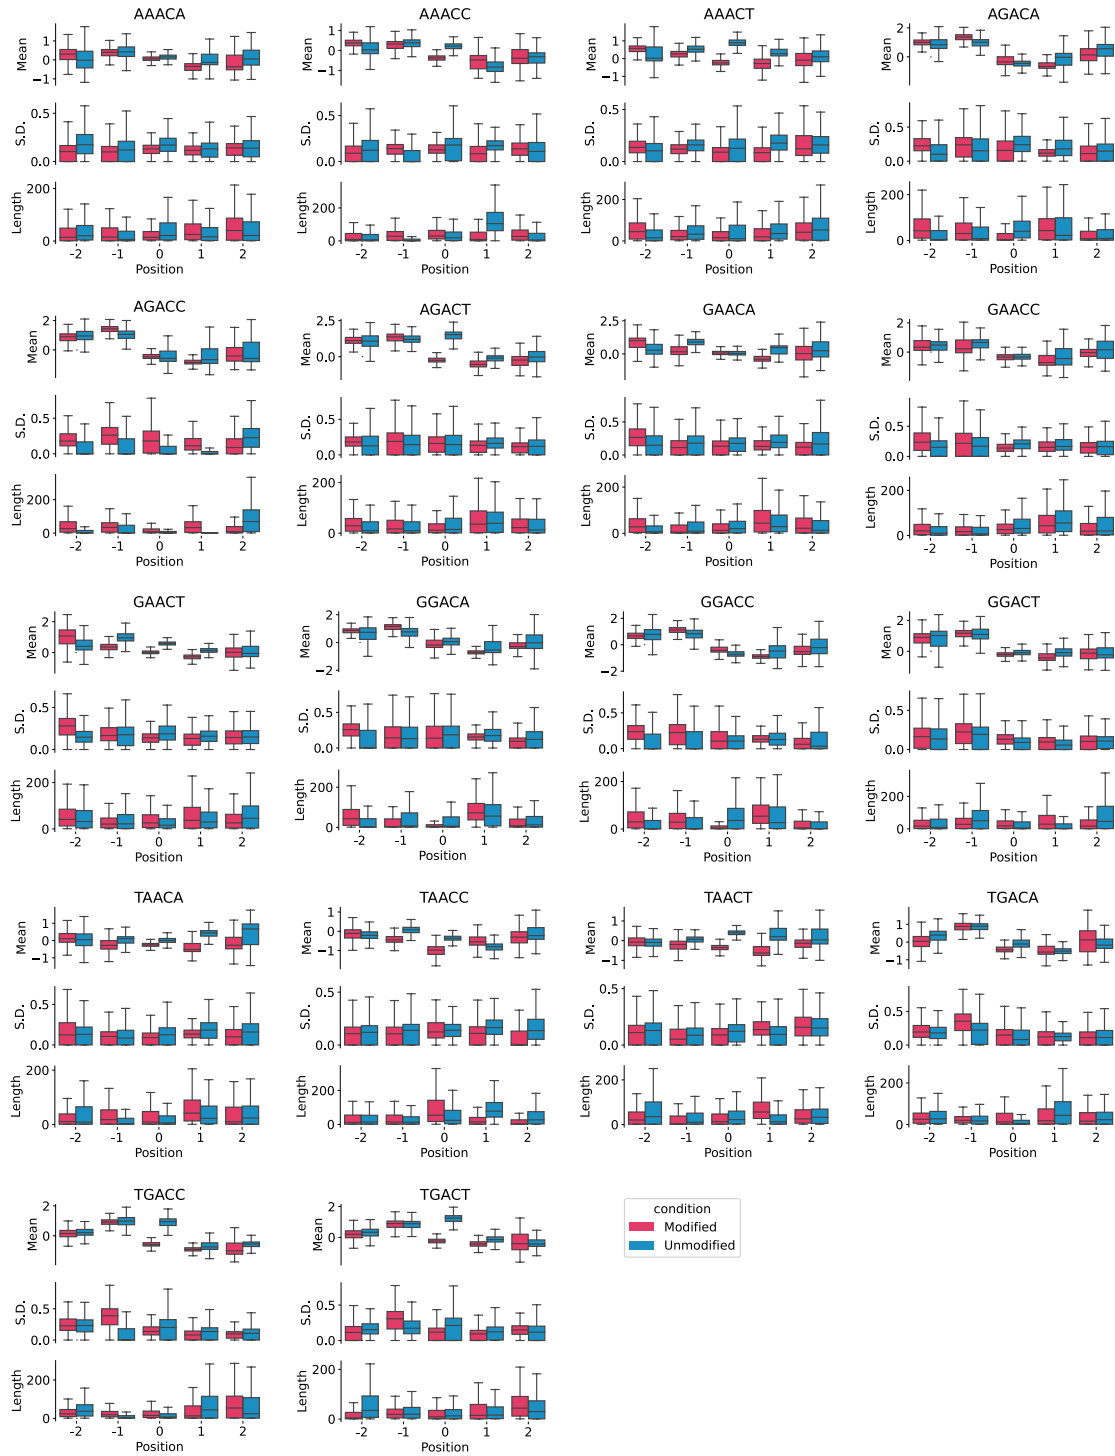

**Supplementary Figure S1. Signal features comparison for all DRACH motifs between modified and unmodified sites extracted from the Epiano IVT dataset.** Box plot comparing the distributions of mean, standard deviation, and length between modified and unmodified sites for all 18 DRACH motifs. Horizontal lines show the median, the box denotes the interquartile range, and the whiskers extend to 1.5 times the interquartile range. Points beyond this range are considered outliers and are removed from the plot.

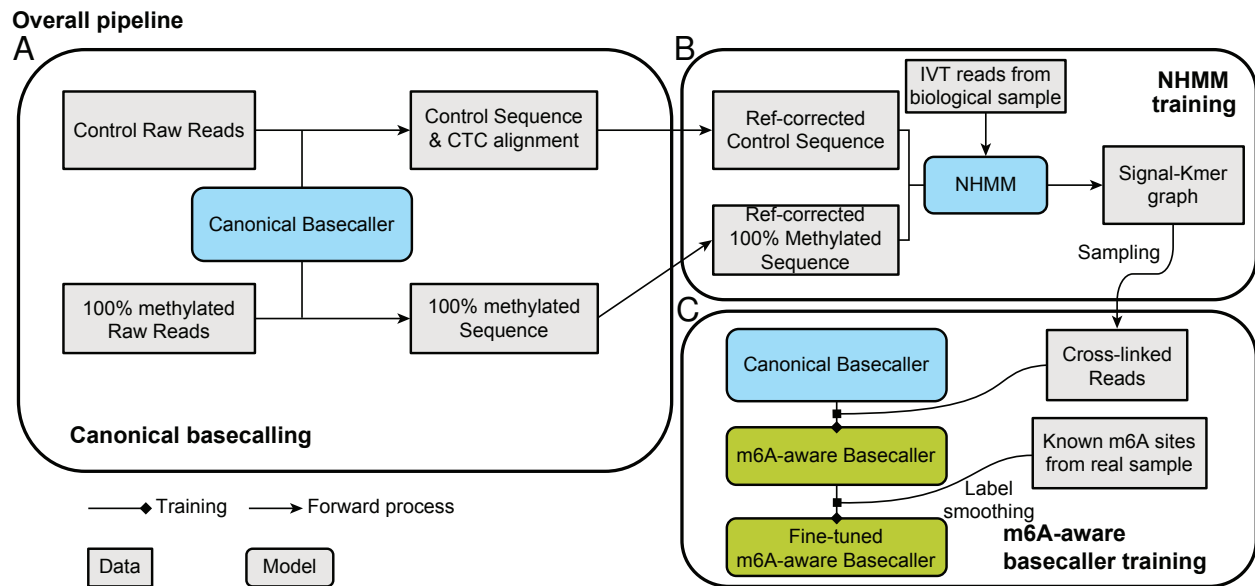

**Supplementary Figure S2. Overall training pipeline of Xron training.** (A) Basecalling the modified and unmodified reads using a canonical basecaller. (B) Training the NHMM with the corrected synthesized RNA sequence and IVT reads from human reference data. The trained NHMM was used to generate a signal  $k$ -mer graph. (C) The Xron m6A-distinguishing Basecaller was trained using the cross-linked reads sampled from the signal  $k$ -mer graph and then fine-tuned on the yeast and human datasets, where putative m6A sites were identified through an immunoprecipitation experiment. We applied label smoothing when fine-tuning the model due to the noisy m6A labels, as the m6A modification for each read was unknown.

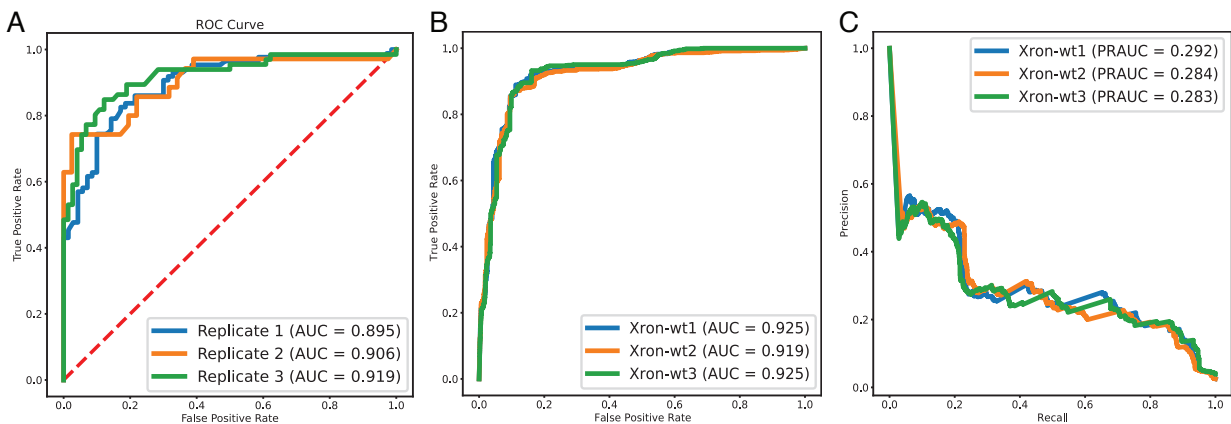

**Supplementary Figure S3. Model trained on HEK293T cell line data and evaluated on yeast and Arabidopsis datasets.** A model is fine-tuned using human HEK293T cell line data, and then evaluated on the (A) yeast *ime4* KO dataset using ROC-AUC, and on the (B) Arabidopsis datasets using ROC-AUC and (C) PRAUC. The model has a similar performance compared to those fine-tuned on the yeast dataset.

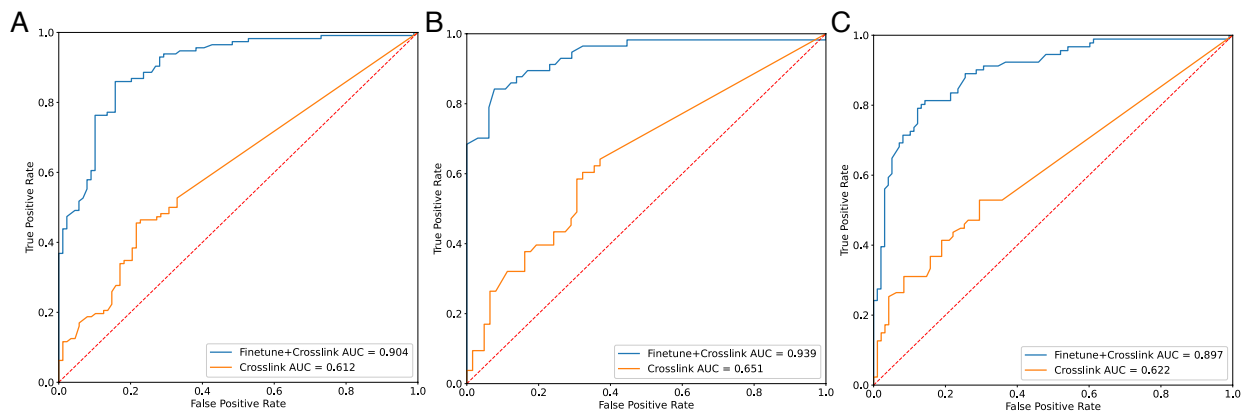

**Supplementary Figure S4. Ablation study of Xron model.** To validate the necessity of finetuning Xron on IP data, an ablation study was conducted. We evaluate the performance of Xron on three biological replicates (A-C) of yeast data, with and without IP data finetuning. The plots show a dramatic decrease in model performance without finetuning using IP data. Xron model was finetuned using the first replicate of the yeast data.

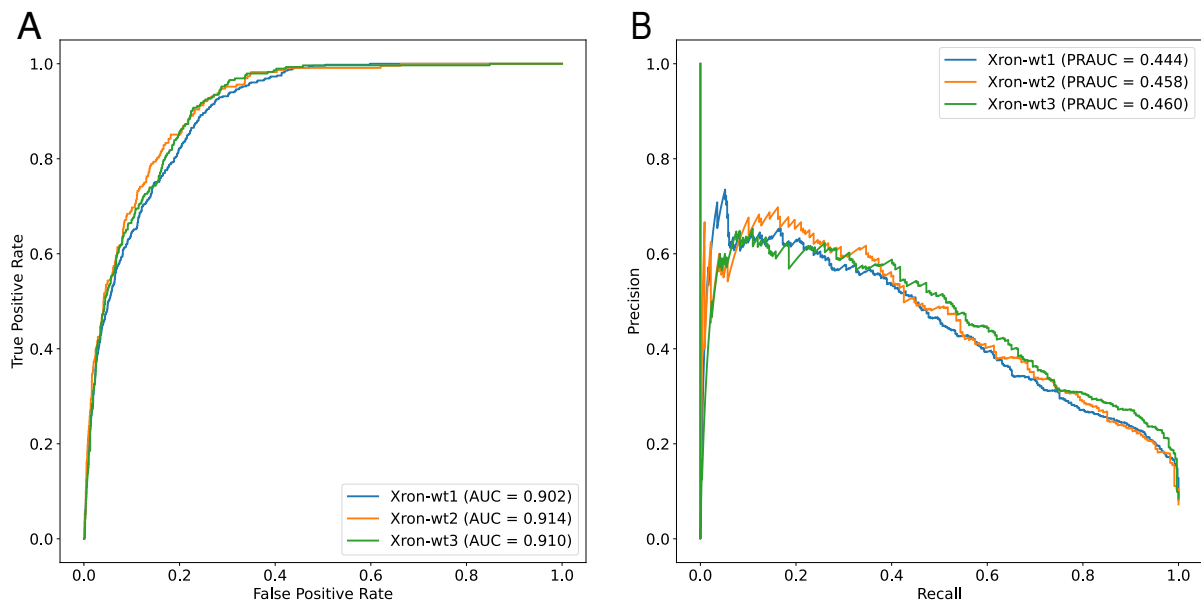

**Supplementary Figure S5. Evaluation on all three replicates of Xron model on human HEK293T cell line.** The AUC (A) and PR (B) curve of the Xron model, which is fine-tuned on the first replicate of the yeast dataset, are based on all three replicates of the HEK293T cell line.

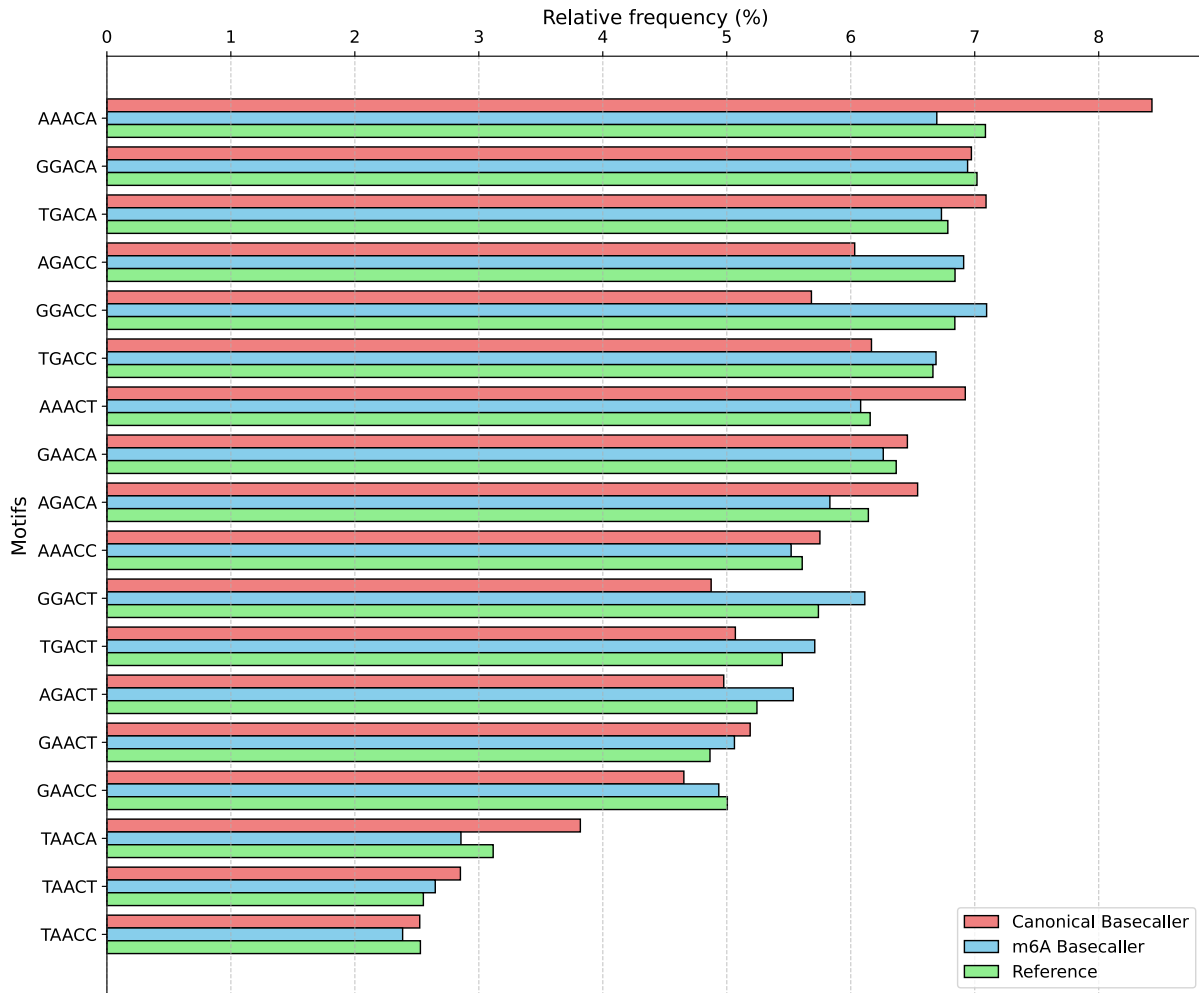

**Supplementary Figure S6. K-mer frequency comparison between the canonical basecaller and m6A-aware basecaller.** To check for any potential context bias in the basecaller, we examined the *k*-mer frequency of the basecalled sequences on the HEK293T cell line, where the canonical basecaller exhibits the most significant performance drop. The results show that, compared to the m6A-aware basecaller, the canonical basecaller has a more deviated *k*-mer distribution in several *k*-mers from DRACH motifs. This deviation indicates a reason for the lower identity rate when basecalling these m6A-modified reads using a canonical basecaller.

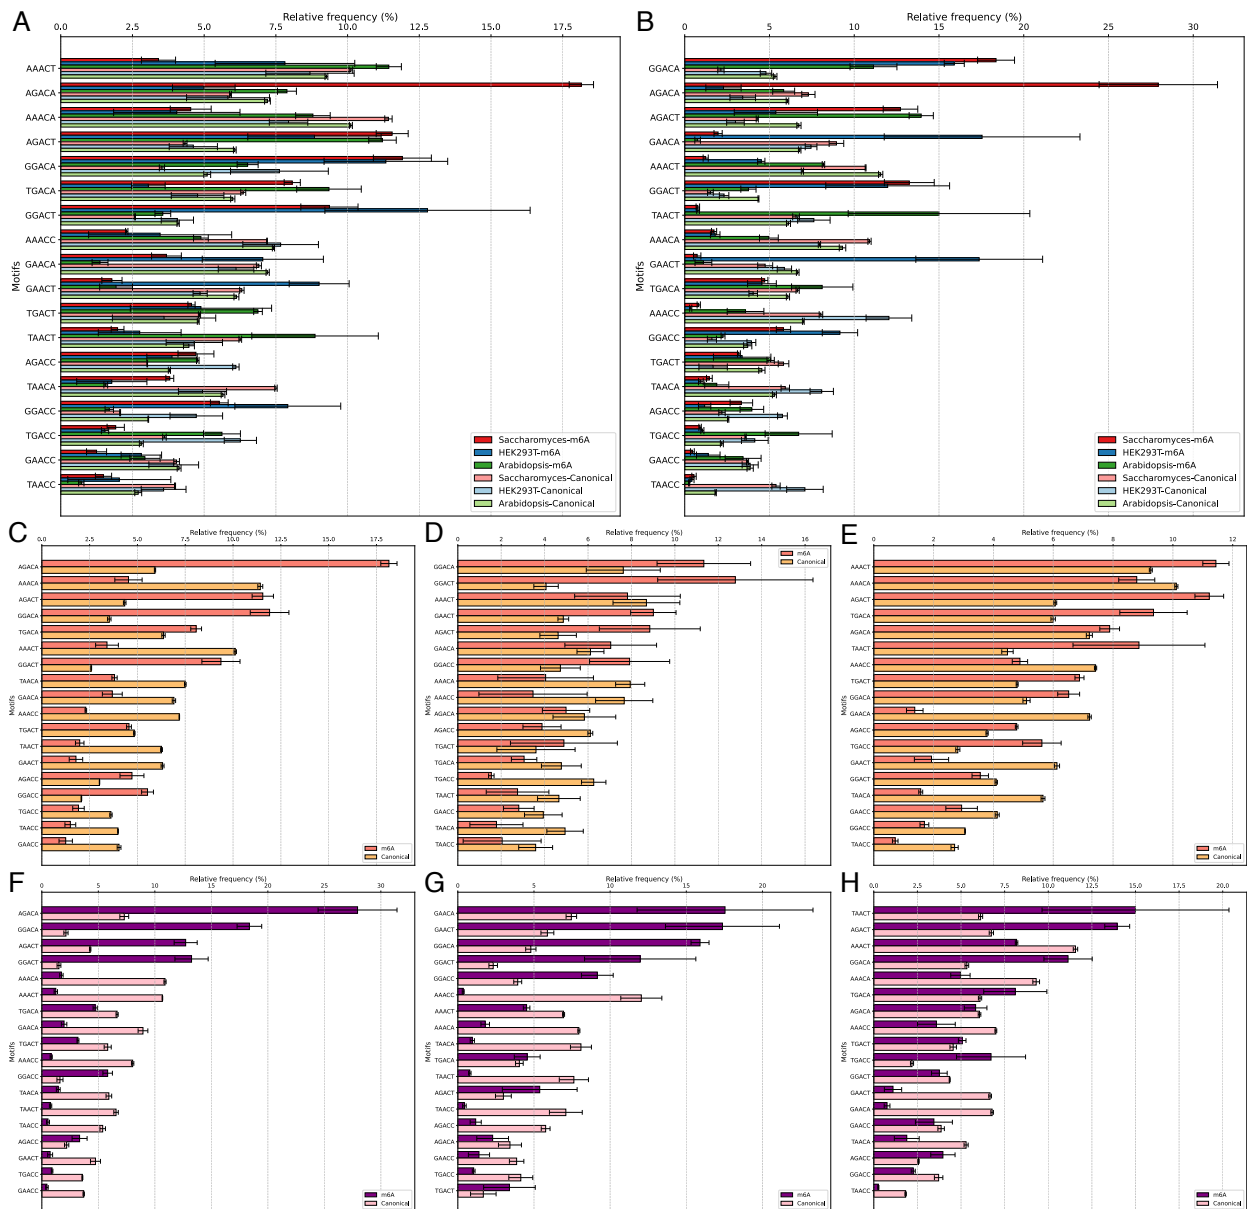

**Supplementary Figure S7. K-mer frequency for modified and unmodified sites.** K-mer frequency of DRACH motifs is analyzed among the Saccharomyces (yeast), HEK293T cell line, and Arabidopsis datasets. Bar plot comparing the proportion of methylated/unmethylated motifs counted for every site (A) or every read (B), where  $n$  reads aligned on the same site count as 1 in (A) and as  $n$  in (B). The bar plot center gives the mean frequency of the 18 fivemer DRACH motif among the 3 replicates while the error bar represents the 95% confidence interval. Separate plots for different datasets (Saccharomyces (yeast), HEK293T cell line, and Arabidopsis) were given for each site (C - E), and each read (F - H) to make a clear comparison the frequency between the methylated and canonical motifs. All reads are basecalled using Xron basecaller.



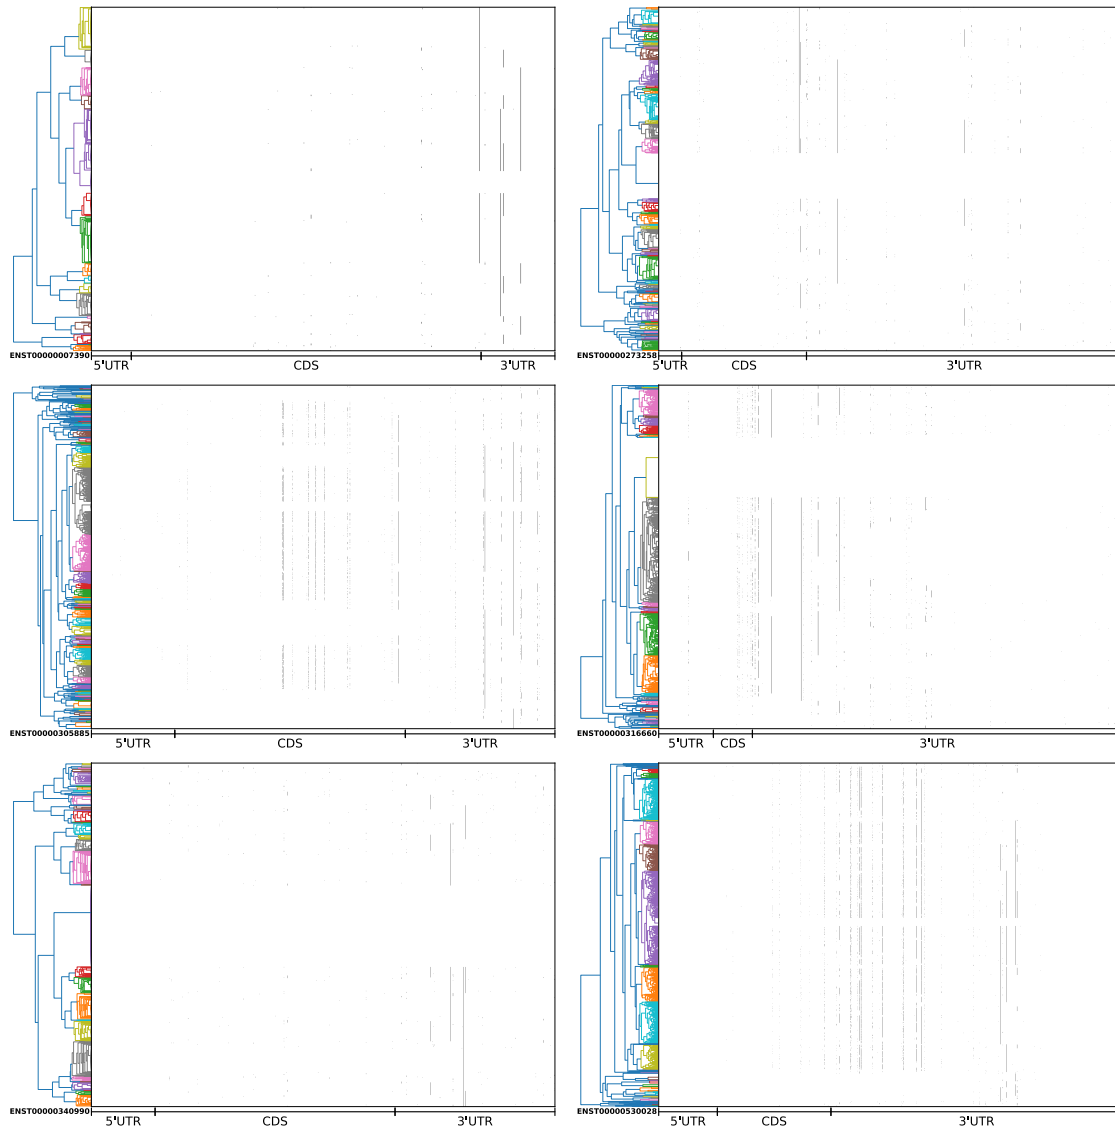

**Supplementary Figure S8. Clustering of modification states** Clustering plot of 6 genes with multiple modification sites. Clustering was conducted using the SciPy hierarchical linkage module with Yule distance. Asynchronous modification is observed near the end of the CDS and in the 3' UTR region in all 6 transcripts (ENST00000340990,  $n = 921$ ; ENST00000305885,  $n = 997$ ; ENST00000530028,  $n = 1201$ ; ENST0000007390,  $n = 780$ ; ENST00000316660,  $n = 1296$ ; ENST00000273258,  $n = 1062$ ).

## References

- 692
- 693 Baum LE, Petrie T, Soules G & Weiss N. 1970. A Maximization Technique Occurring in the Statistical  
694 Analysis of Probabilistic Functions of Markov Chains. *Ann Math Stat* **41**: 164–171. doi: 10.1214/aoms/  
695 1177697196
- 696 Graves A, Fernández S, Gomez F & Schmidhuber J (2006). “Connectionist Temporal Classification: La-  
697 belling Unsegmented Sequence Data with Recurrent Neural Networks”. In: *Proceedings of the 23rd*  
698 *International Conference on Machine Learning*, 369–376. doi: 10.1145/1143844.1143891.
- 699 Hughes JP, Guttorp P & Charles SP. 1999. A Non-Homogeneous Hidden Markov Model for Precipitation  
700 Occurrence. *J Roy Statistical Society* **48**: 15–30. doi: 10.1111/1467-9876.00136
- 701 Li H. 2018. Minimap2: Pairwise Alignment for Nucleotide Sequences. *Bioinformatics* **34**: 3094–3100. doi:  
702 10.1093/bioinformatics/bty191
- 703 Meligkotsidou L & Dellaportas P. 2011. Forecasting with Non-Homogeneous Hidden Markov Models. *Statist*  
704 *Comput* **21**: 439–449. doi: 10.1007/s11222-010-9180-5
- 705 Netzer O, Lattin JM & Srinivasan V. 2008. A Hidden Markov Model of Customer Relationship Dynamics.  
706 *Marketing Sci* **27**: 185–204. doi: 10.1287/mksc.1070.0294
- 707 Oxford Nanopore Technologies (2021). *Guppy*. Version 5.0.11.
- 708 Simpson JT, Workman RE, Zuzarte P, David M, Dursi LJ & Timp W. 2017. Detecting DNA Cytosine Methy-  
709 lation Using Nanopore Sequencing. *Nat Methods* **14**: 407–410. doi: 10.1038/nmeth.4184
- 710 Sutton RS & Barto AG. 2018. In *Reinforcement Learning: An Introduction*. MIT press, Cambridge, Mas-  
711 sachusetts.
- 712 Teng H, Cao MD, Hall MB, Duarte T, Wang S & Coin LJ. 2018. Chiron: Translating Nanopore Raw Signal  
713 Directly into Nucleotide Sequence Using Deep Learning. *Gigascience* **7**: giy037. doi: 10.1093/gigascie  
714 nce/giy037
- 715 Workman RE, Tang AD, Tang PS, Jain M, Tyson JR, Razaghi R, Zuzarte PC, Gilpatrick T, Payne A, Quick  
716 J, et al. 2019. Nanopore Native RNA Sequencing of a Human Poly (A) Transcriptome. *Nat Methods* **16**:  
717 1297–1305. doi: 10.1038/s41592-019-0617-2
